# Supplementary material
Source: ML conference proceedings conference paper supplement (https://openreview.net/forum?id=YoEFNqMNmG)

Different Iteration Trajectory when taking different m

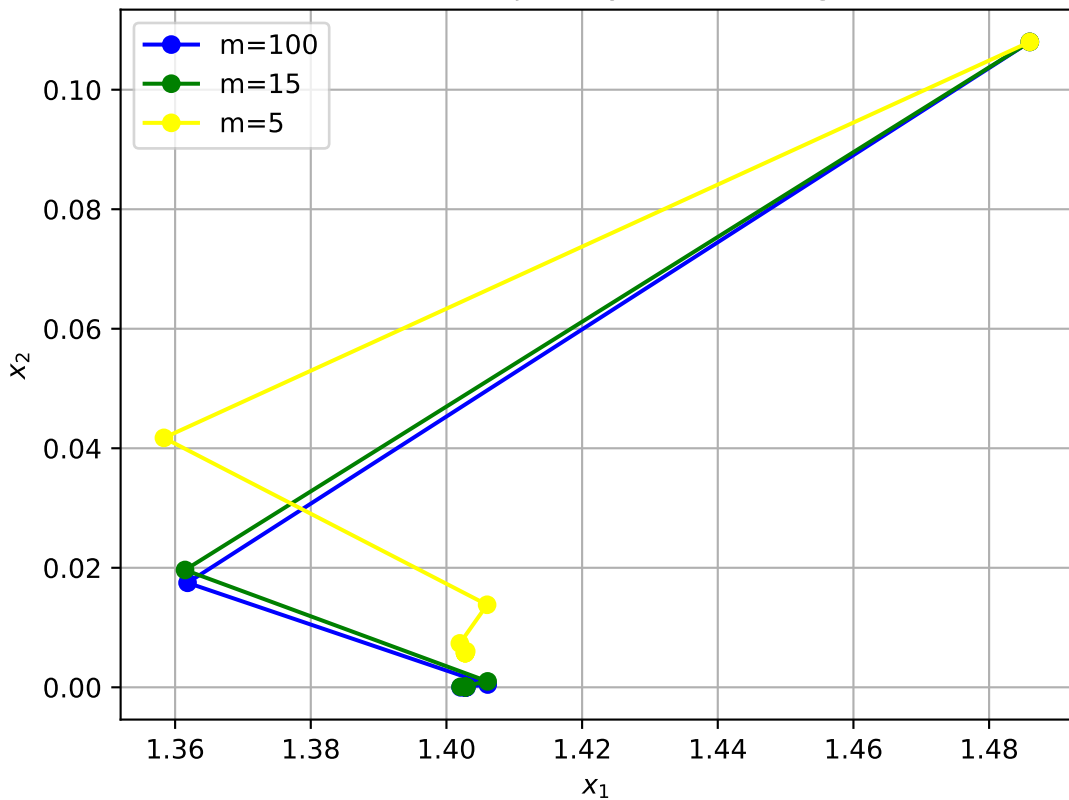

Supplement: supplementary_material [file Different Iteration Trajectory.pdf › fixed_point_code-main/pythonProject3/Different Iteration Trajectory.pdf]

# Exponential Function Case

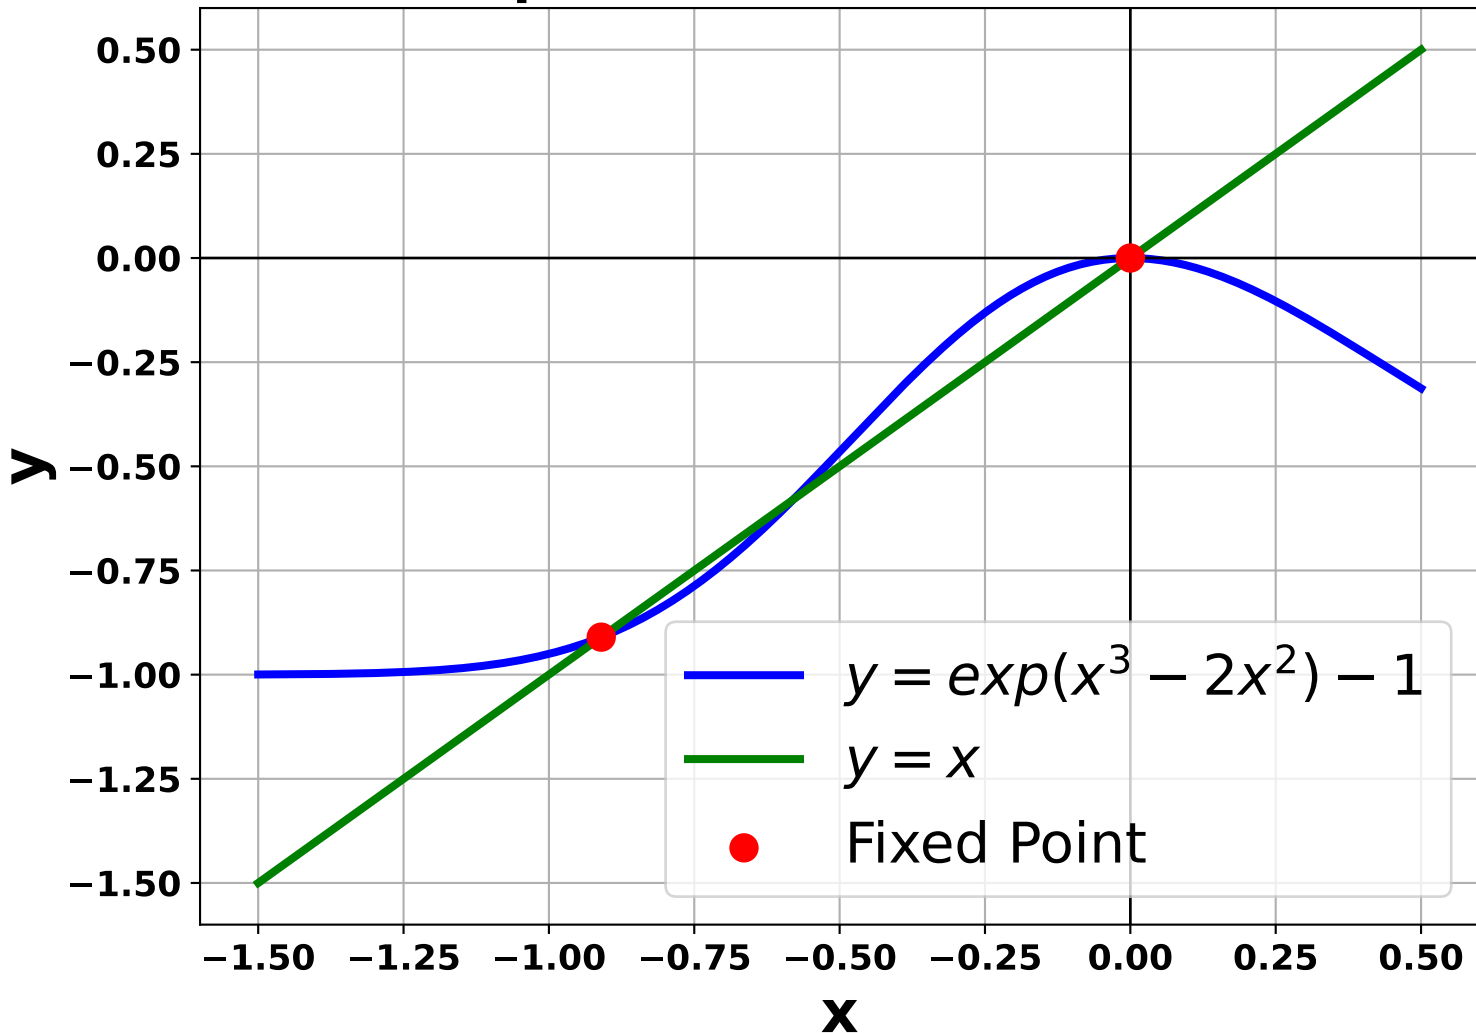

Supplement: supplementary_material [file Exponential Function Case.pdf › fixed_point_code-main/pythonProject3/Exponential Function Case.pdf]

# Polynomial Function Case

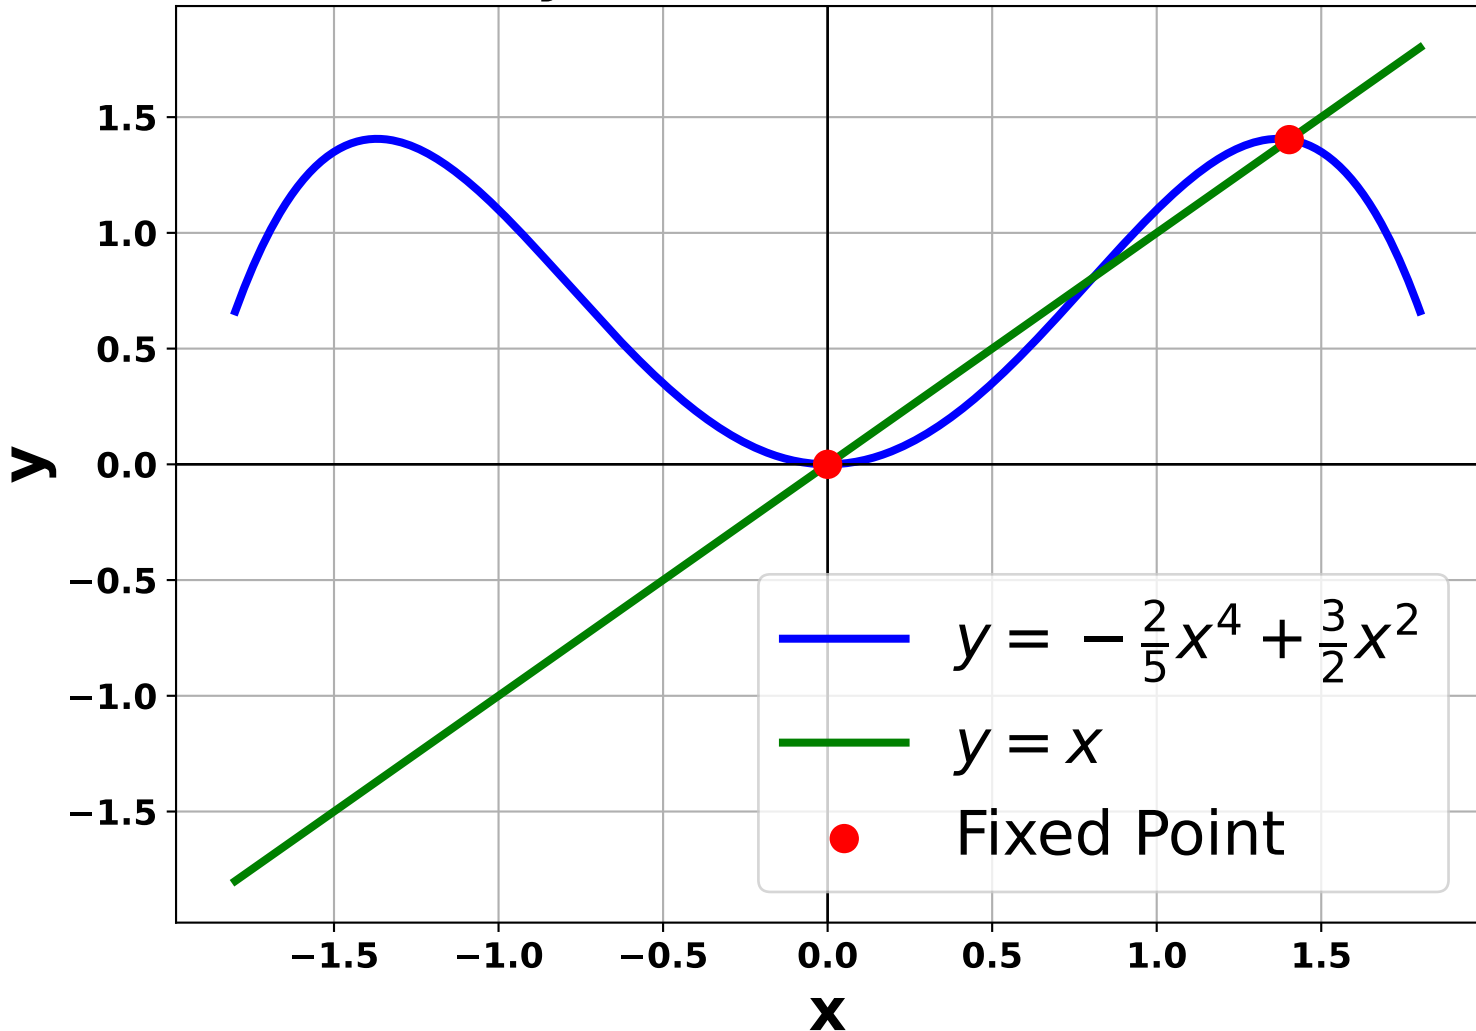

Supplement: supplementary_material [file Polynomial Function Case.pdf › fixed_point_code-main/pythonProject3/Polynomial Function Case.pdf]

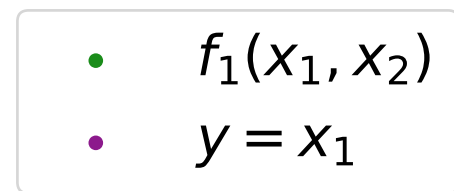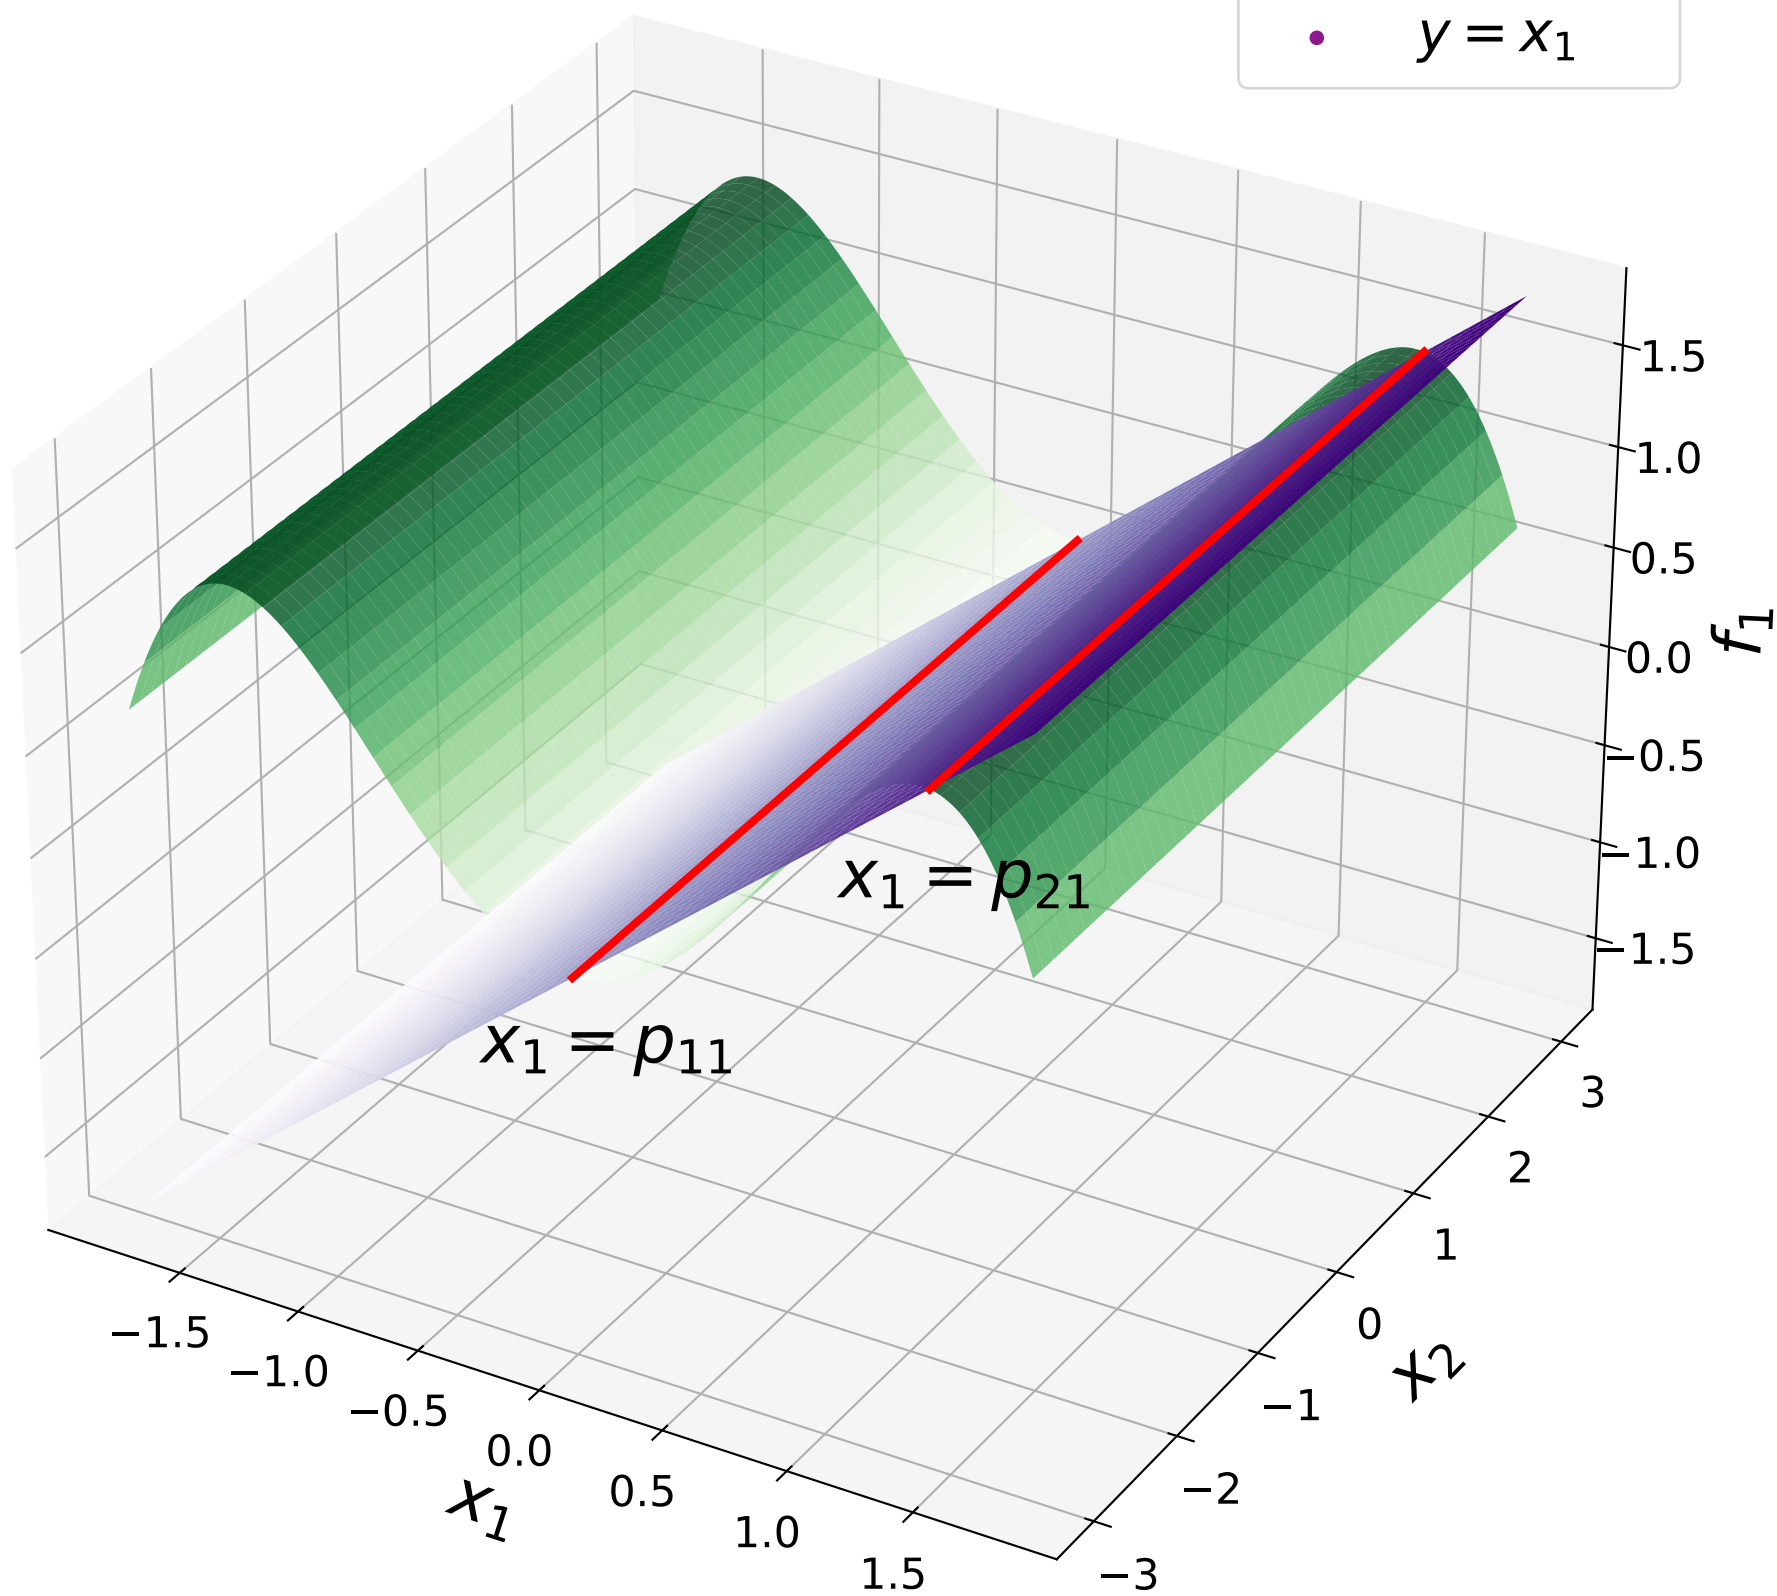

Supplement: supplementary_material [file f_1.pdf › fixed_point_code-main/pythonProject3/f_1.pdf]

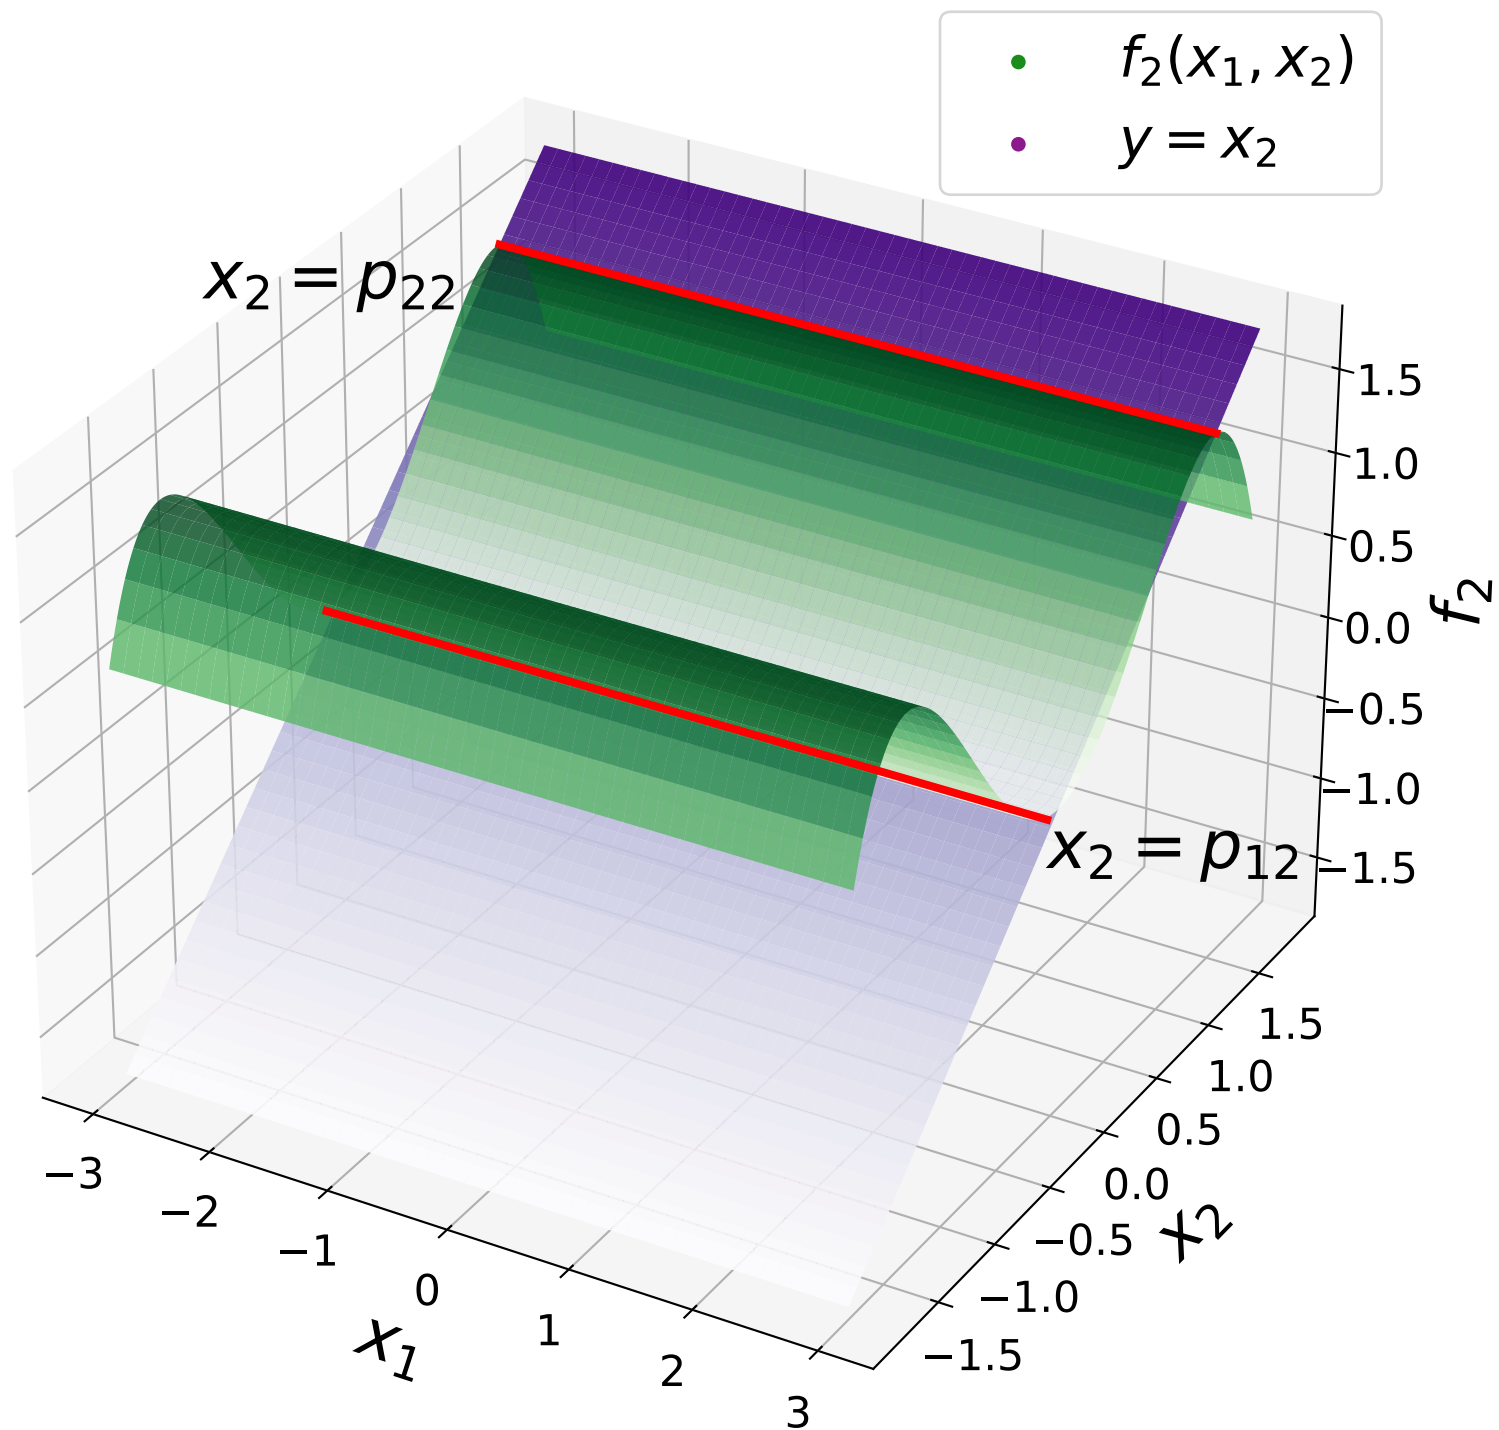

Supplement: supplementary_material [file f_2.pdf › fixed_point_code-main/pythonProject3/f_2.pdf]

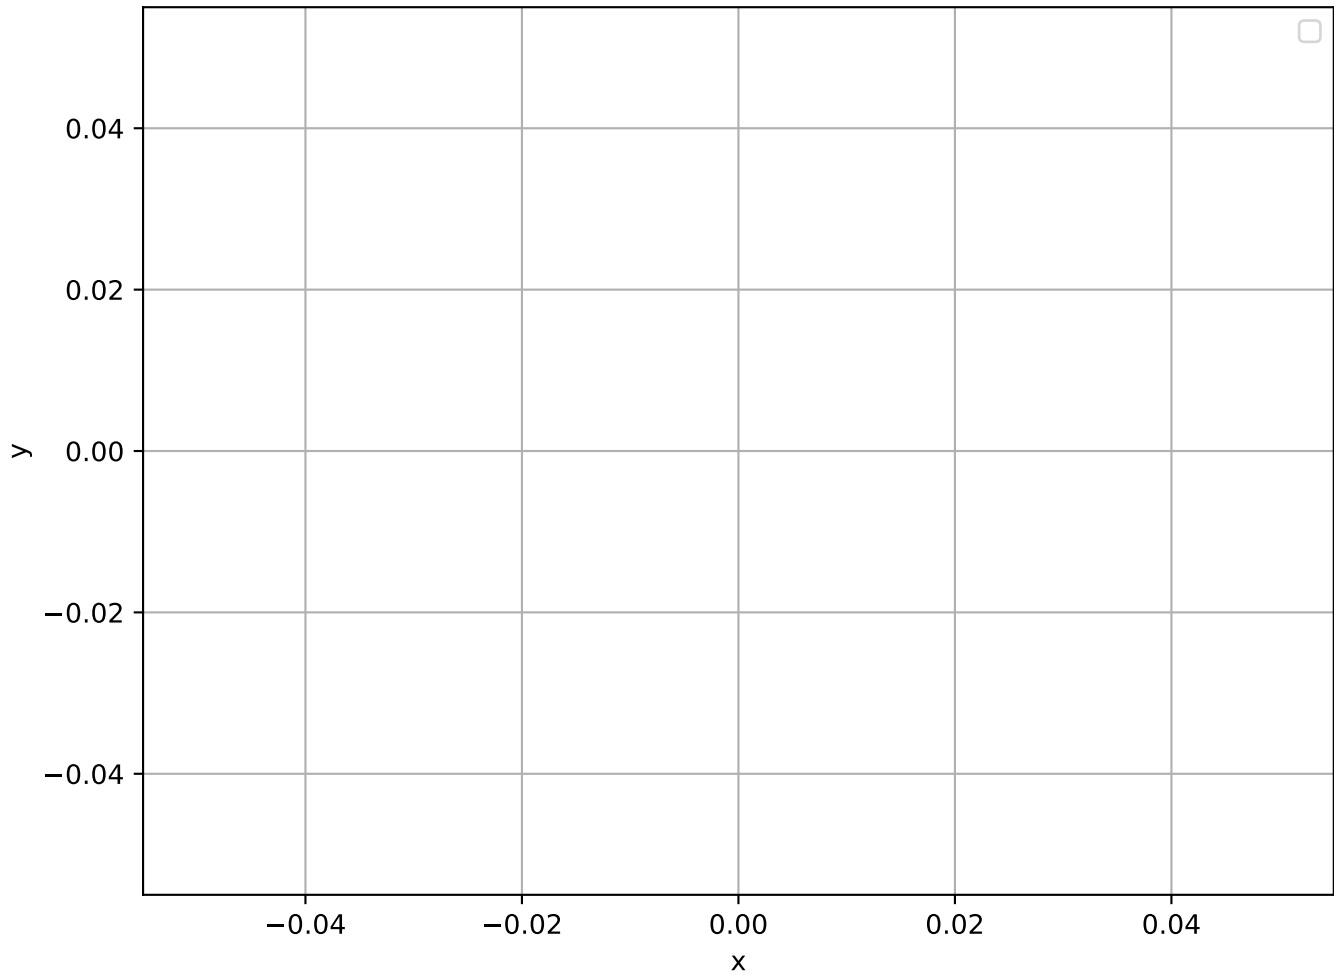

Supplement: supplementary_material [file output_figure.pdf › fixed_point_code-main/pythonProject3/output_figure.pdf]
